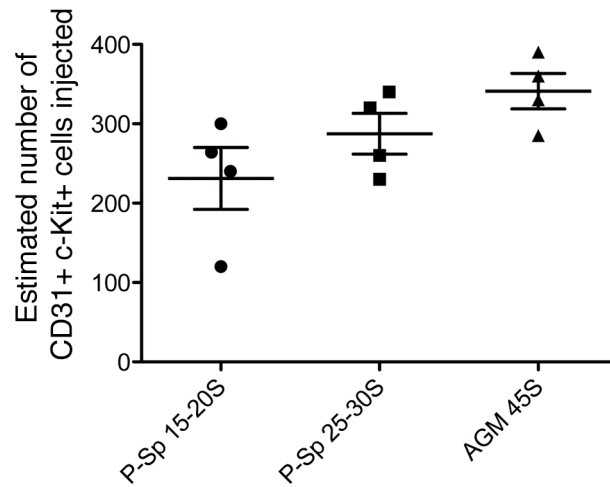

**Fig. S1. Estimated number of multipotent progenitors transplanted into *Rag2*<sup>γc</sup><sup>-/-</sup> recipients.** CD31<sup>+</sup> Kit<sup>+</sup> multipotent progenitors were quantified by flow cytometry (top panel). To inject similar number of progenitors at the three stages analyzed (lower panel), the recipients were transplanted with 12 P-Sp per mouse at 9 dpc (15-20S), 10 P-Sp per mouse at 9.5 dpc (20-25S) or 3 AGM per mouse at 11 dpc (45S).

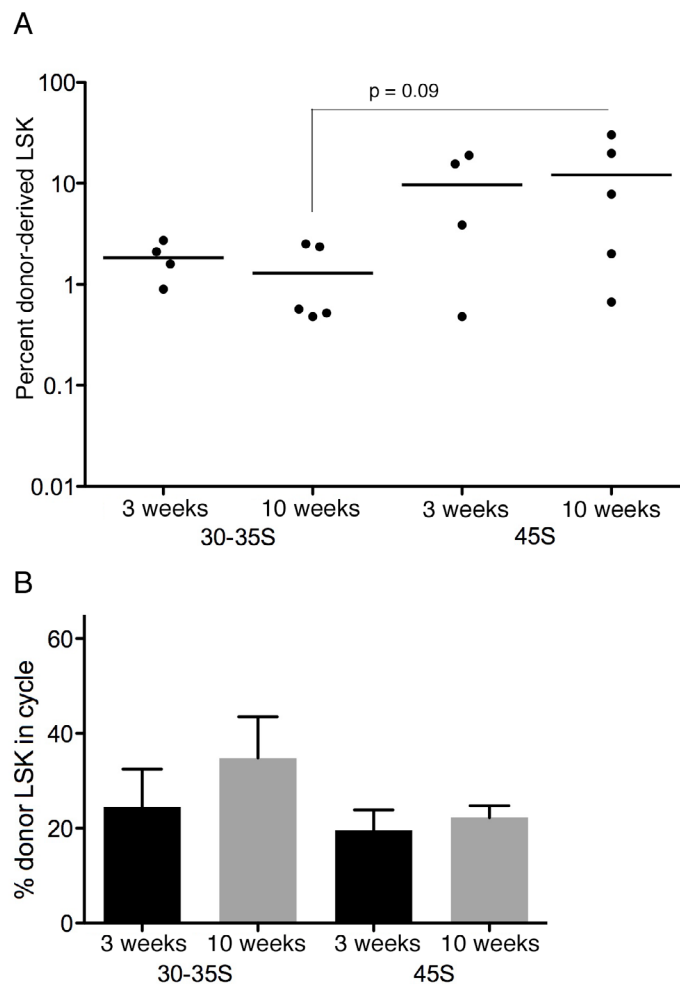

**Fig. S2. Frequency of LSK cells in cycle after reconstitution.** Sublethally irradiated *Rag2*<sup>γc</sup><sup>-/-</sup> recipients were intravenously transplanted with cells isolated from 30-35S P-Sp/AGM (4 e.e.) or 45S AGM (2 e.e.). Donor-derived LSK cells in the BM were analyzed using the intracellular Ki67/DAPI staining 3 and 10 weeks after transplantation. The frequency of cells expressing high levels of Ki67/DAPI is shown.

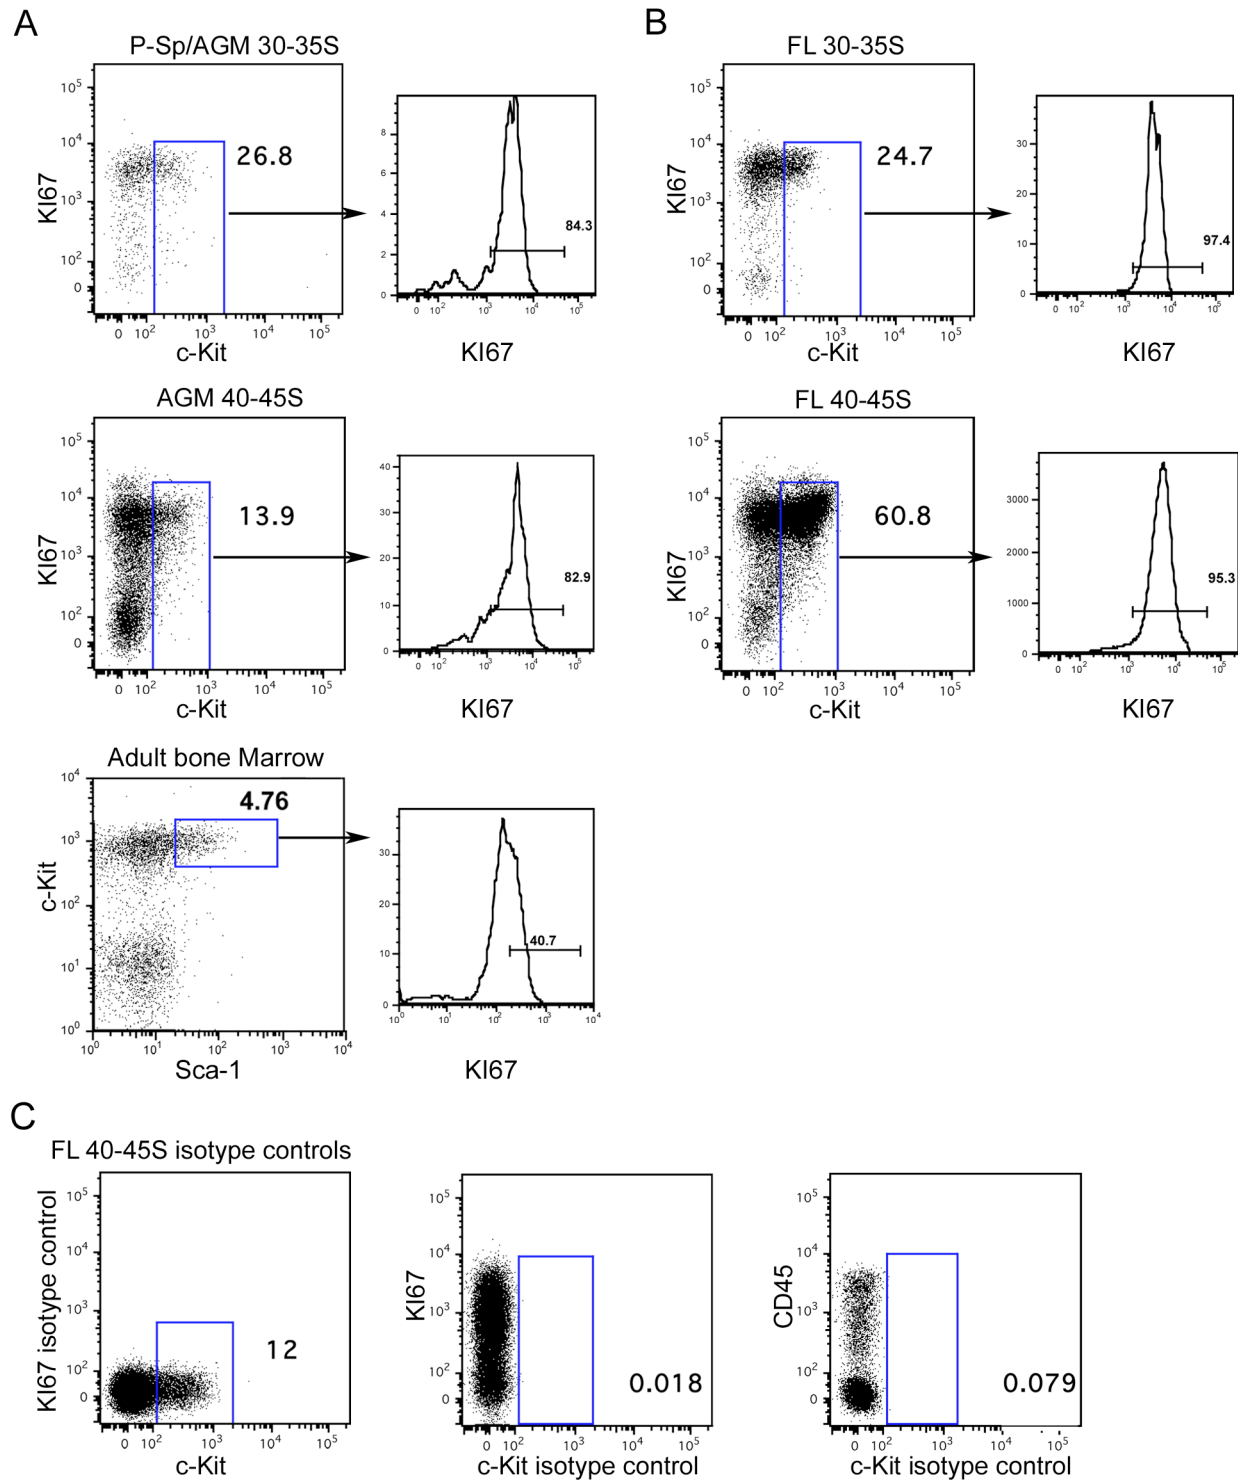

**Fig. S3. Proliferative activity of AGM and FL cells.** (A) Flow cytometry profiles of KI67 expression in CD31<sup>+</sup>Kit<sup>+</sup>CD45<sup>low</sup> imHSC from 30-35S P-Sp/AGM (top panel) and in CD31<sup>+</sup>Kit<sup>+</sup> CD45<sup>low/+</sup> HSC from 40-45S AGM (middle panel). (Lower panel) KI67 expression in LSK cells from adult BM. (B) Flow cytometry profiles of KI67 expression in CD31<sup>+</sup>Kit<sup>+</sup>CD45<sup>+</sup> cells from 30-35S FL (top panel), from 40-45S FL (lower panel). (C) Staining of 40-45S FL cells with isotype controls.

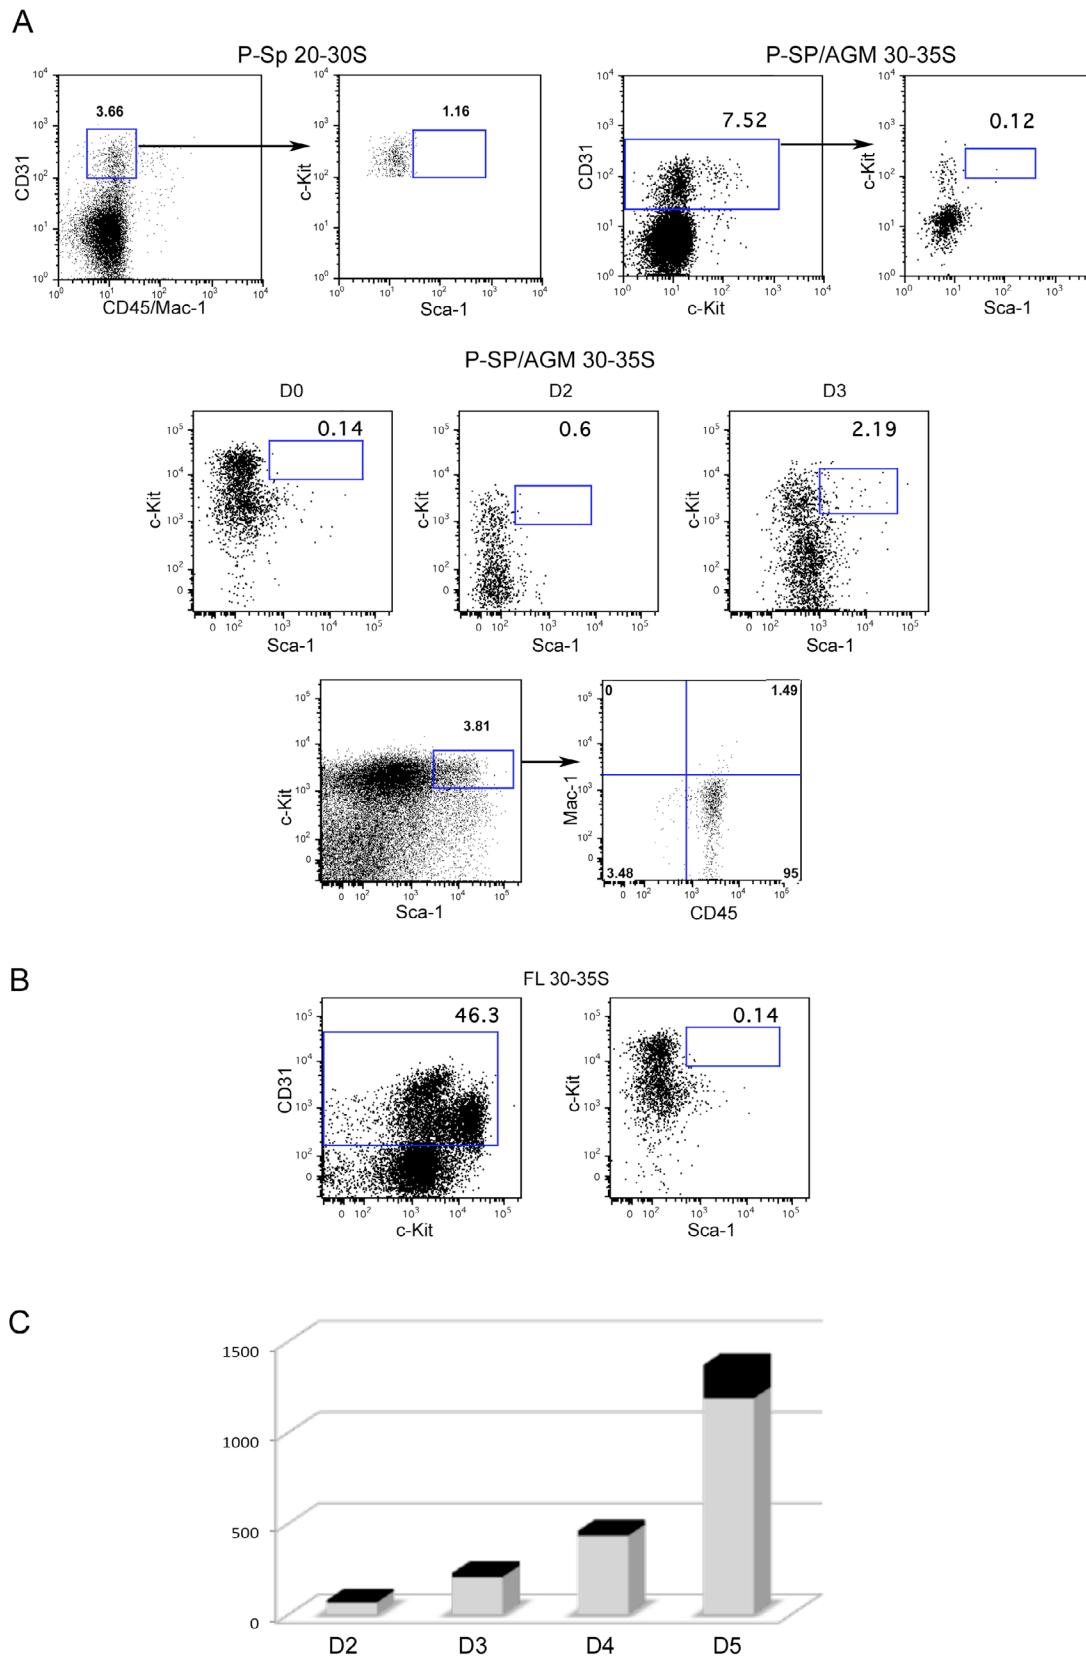

**Fig. S4. Flow cytometry profile of imHSC from the P-Sp/AGM, freshly isolated or after culture.** (A) ImHSC from 20-30S P-Sp or from 30-35S P-Sp/AGM do not overtly express Sca-1 (upper panel). After culture with TPO on OP9 stromal cells, the expression of Sca-1 is progressively acquired (middle panel). LSK cells derived from the culture of Kit<sup>+</sup> CD45<sup>-/low</sup> Mac-1<sup>-/low</sup> imHSC (30-35S P-Sp/AGM) express CD45 and Mac-1 (lower panel). (B) Similar to imHSC from the 30-35S P-Sp/AGM, imHSC from the 30-35S FL do not express Sca-1. (C) Number of LSK (grey bars) and LSK CD48<sup>-</sup> CD150<sup>+</sup> (black bars) per 100 CD31<sup>+</sup> Kit<sup>+</sup> CD45<sup>-</sup> sorted P-Sp/AGM at days 2, 3 4 and 5 of culture with OP9 stroma and TPO.

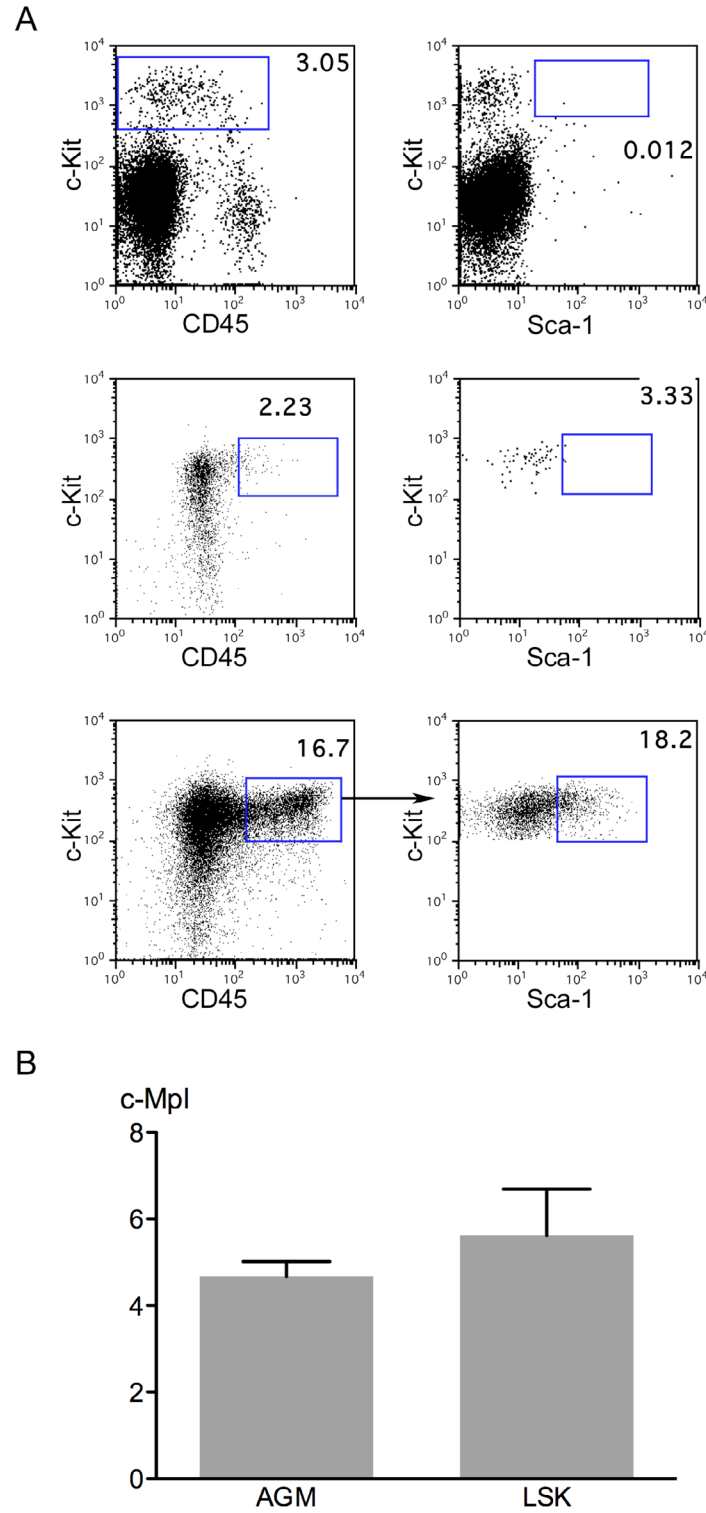

**Fig. S5. TPO promotes in vitro maturation of 30-35S P-Sp/AGM multipotent progenitors.** (A) Freshly isolated CD31<sup>+</sup>Kit<sup>+</sup> cells from 30-35S P-Sp/AGM initially lack the expression of CD45 and Sca-1 (top panel). After culture on OP9 stroma, in the absence of TPO, these 30-35S P-Sp/AGM cells give rise to a limited number of CD45<sup>+</sup>Sca-1<sup>+</sup> cells (middle panel), whereas when TPO is added to the culture medium, a well-defined population of CD45<sup>+</sup>Sca-1<sup>+</sup> cells appears (lower panel). (B) Sorted 30-35S Kit<sup>+</sup>CD31<sup>+</sup> P-Sp/AGM cells and adult bone marrow LSK were subjected to Q-RT-PCR for the detection of Mpl and HPRT mRNA (the receptor of TPO). Results are expressed as arbitrary units (ratio of Mpl to HPRT).

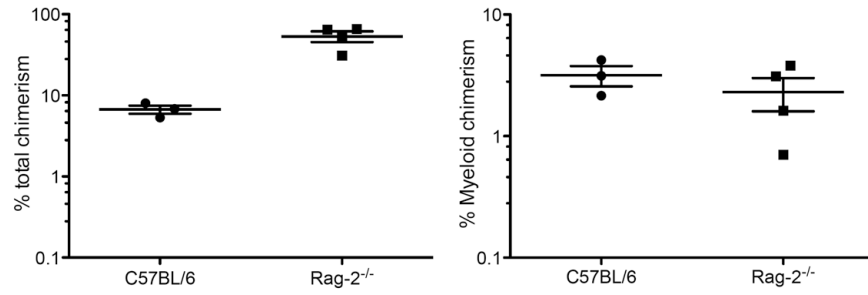

**Fig. S6. Comparison of total and myeloid chimerism levels in C57BL/6 and *Rag2*<sup>-/-</sup> recipients.** This figure relates to Fig. 3C. Analysis of the chimerism level in *Rag2*<sup>-/-</sup> and C57BL/6 recipients 6 months after engraftment of total cells recovered from 30-35S P-Sp/AGM cells cultured on OP9 stroma with TPO. The total chimerism level in the BM of *Rag2*<sup>-/-</sup> recipients often reaches levels close to 90%, owing to the 100% donor-derived contribution to the lymphoid compartment, when it reaches about 10% in similarly injected C57BL/6 recipients (left panel). The corresponding myeloid chimerism in the two types of recipients (right panel) is similar ( $P=0.4148$ ) and ranges on average from 2% to 4%.

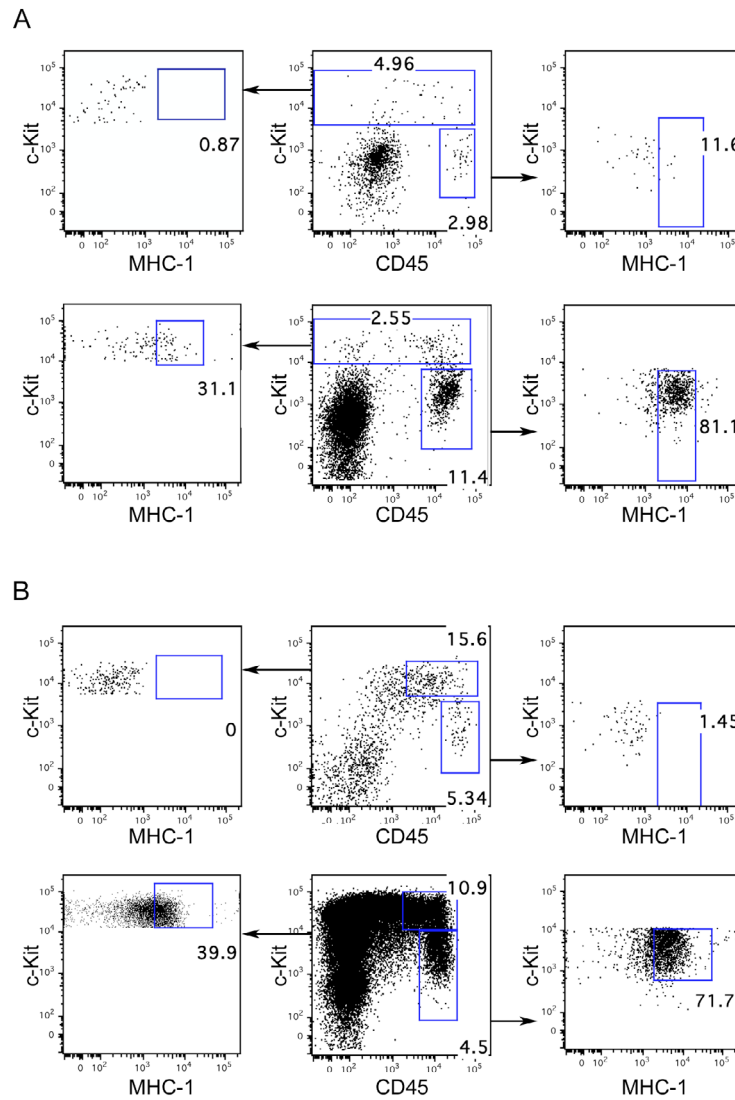

**Fig. S7. Acquisition of MHC class I correlates with CD45 expression.** This figure relates to Figs 4 and 6. (A) CD45 against MHC class I (H2D<sup>b</sup>) profile (middle panels) of Kit<sup>+</sup> progenitors from 30-35S P-Sp/AGM (top panel) and 45S AGM (bottom panel). Within the hematopoietic progenitor compartment, MHC class I expression is restricted to CD45<sup>+</sup> cells (right panels). At earlier stages, Kit<sup>+</sup> cells express low levels of CD45, and MHC class I is virtually undetectable (Fig. 4A). (B) CD45 against MHC class I (H2D<sup>b</sup>) profile (middle panels) of Kit<sup>+</sup> progenitors from 30-35S (top panel) and 45S (bottom panel).

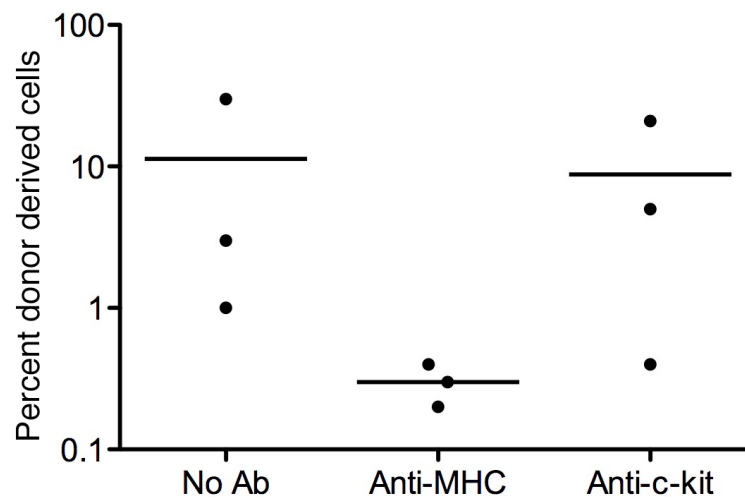

**Fig. S8. Incubation of AGM with Anti-H2D<sup>b</sup> antibody interferes with reconstitution capacity.** CD45.2<sup>+</sup> recipient mice were injected with 3 e.e. AGM cells from 45S embryos. Prior to injection, cells were incubated with anti-Kit or anti-H2D<sup>b</sup> antibodies. Results show percentage donor-derived cells in the blood 24 weeks after transfer.
